# Supplementary material for: Subacute toxicological evaluation of AT-533 and AT-533 gel in Sprague-Dawley rats
Source: PubMed Central journal article supplement — Exp Ther Med. 2021 Apr 15;21(6):632. doi: 10.3892/etm.2021.10064 (PMC8097234; doi:10.3892/etm.2021.10064), 2021-04-15

Figure S1. Histological analysis of rat kidneys treated with AT-533 or AT-533 gel in the 30-day subacute toxicity. Representative micrographs from female rats under the conditions of (A) control, (B) blank, (C) AT-533 gel, (D) vehicle, (E) 1 mg/kg AT-533, (F) 2 mg/kg AT-533 and (G) 4 mg/kg AT-533 stained with hematoxylin and eosin. Representative micrographs from male rats under the conditions of (H) control, (I) blank, (J) AT-533 gel, (K) vehicle, (L) 1 mg/kg AT-533, (M) 2 mg/kg AT-533 and (N) 4 mg/kg AT-533 hematoxylin and eosin. Magnification, x20.

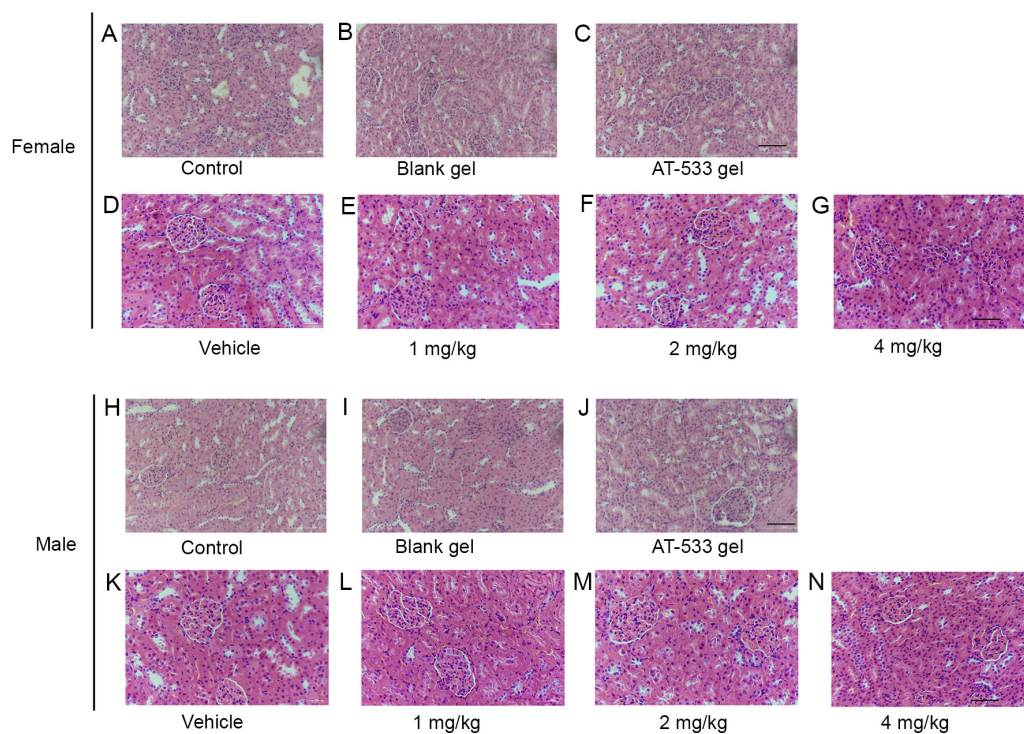

Figure S2. Histological analysis of rat hearts treated with AT-533 or AT-533 gel in the 30-day subacute toxicity. Representative micrographs from female rats under the conditions of (A) control, (B) blank, (C) AT-533 gel, (D) vehicle, (E) 1 mg/kg AT-533, (F) 2 mg/kg AT-533 and (G) 4 mg/kg AT-533 stained with hematoxylin and eosin. Representative micrographs from male rats under the conditions of (H) control, (I) blank, (J) AT-533 gel, (K) vehicle, (L) 1 mg/kg AT-533, (M) 2 mg/kg AT-533 and (N) 4 mg/kg AT-533 hematoxylin and eosin. Magnification, x20.

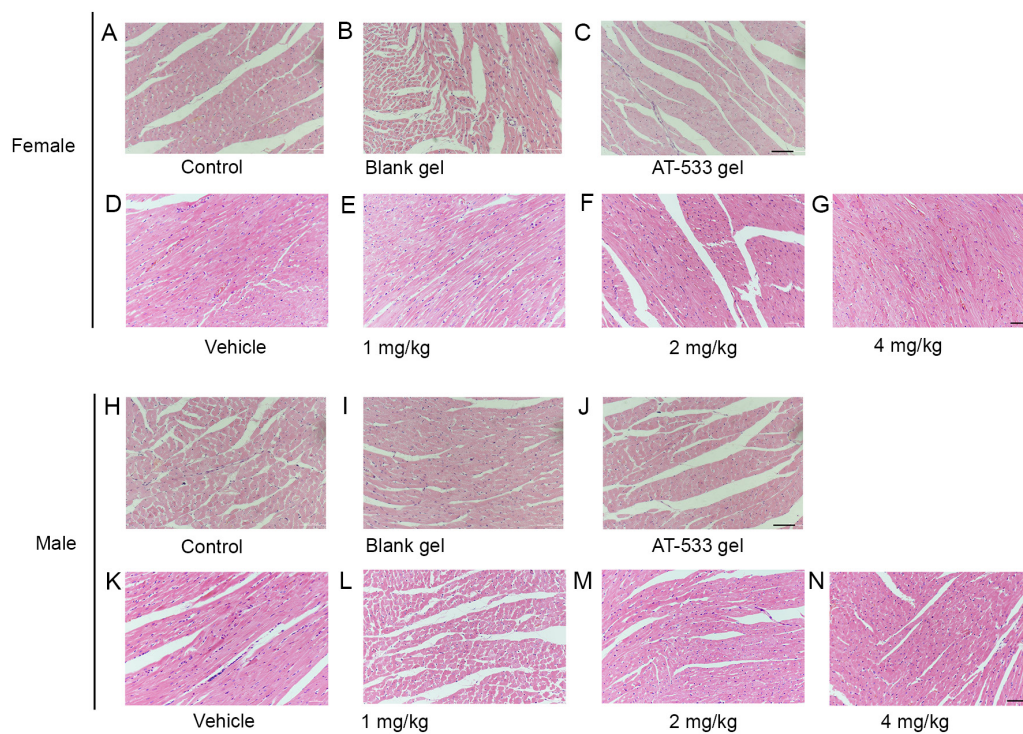

Figure S3. Histological analysis of rat spleen treated with AT-533 or AT-533 gel in the 30-day subacute toxicity. Representative micrographs from female rats under the conditions of (A) control, (B) blank, (C) AT-533 gel, (D) vehicle, (E) 1 mg/kg AT-533, (F) 2 mg/kg AT-533 and (G) 4 mg/kg AT-533 stained with hematoxylin and eosin. Representative micrographs from male rats under the conditions of (H) control, (I) blank, (J) AT-533 gel, (K) vehicle, (L) 1 mg/kg AT-533, (M) 2 mg/kg AT-533 and (N) 4 mg/kg AT-533 hematoxylin and eosin. Magnification, x20.

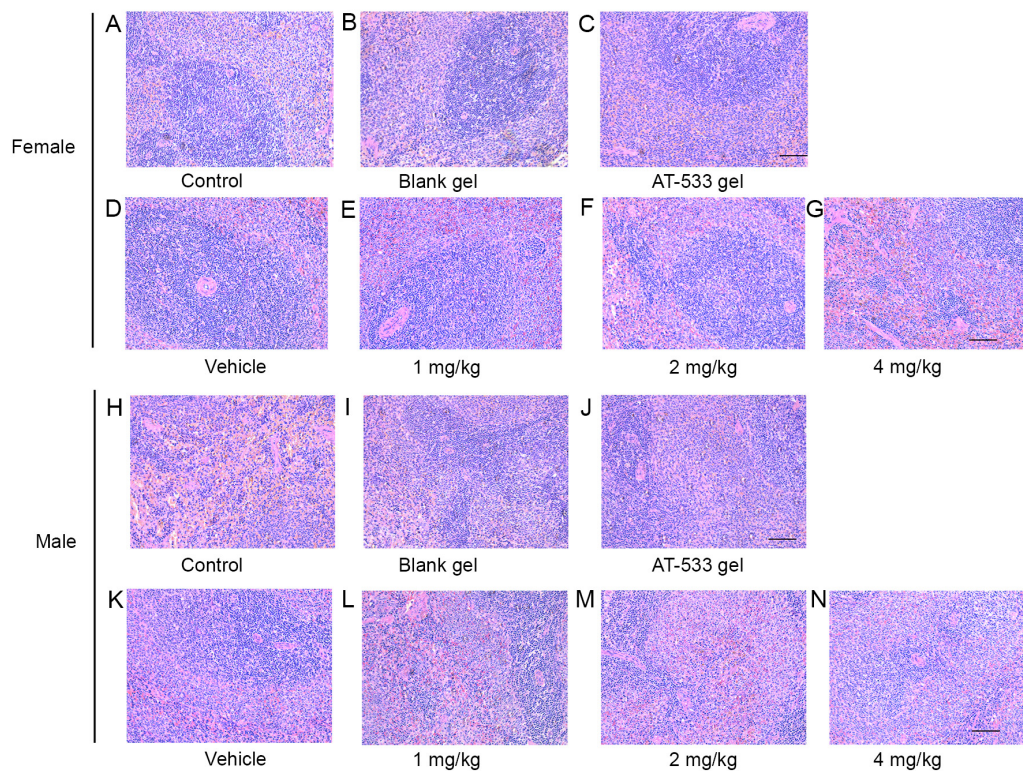

Supplement: Supplementary_Data.pdf [file Supplementary_Data.pdf]
